# Supplementary material for: Theratyping of the Rare CFTR Variants E193K and R334W in Rectal Organoid-Derived Epithelial Monolayers
Source: MDPI journal article supplement (doi:10.3390/jpm12040632), 2022-04-14
Supplement: s1 [file s1]

**Supplementary Table S1.** Separate measurements of chloride and bicarbonate secretory currents in 2D HIOs of a patient with a G542X/F508del genotype in Meyler, chloride only, or bicarbonate only bath fluid. Mean  $\pm$  SE of 4 technical replicates are shown.

|             |                            | G542X/F508del |     |             |     |          |     |
|-------------|----------------------------|---------------|-----|-------------|-----|----------|-----|
|             |                            | Meyler        |     | Bicarbonate |     | Chloride |     |
|             |                            | Mean          | SE  | Mean        | SE  | Mean     | SE  |
| DMSO        | $\Delta$ isc<br>Forskolin  | 0.4           | 0.3 | 0.6         | 0.4 | 2.2      | 1.6 |
|             | $\Delta$ isc<br>CFTRinh172 | 0.1           | 0.2 | 0.3         | 0.5 | -1.9     | 1.6 |
| ELX/TEZ/IVA | $\Delta$ isc<br>Forskolin  | 8.0           | 3.1 | 3.1         | 1.0 | 11.5     | 3.4 |
|             | $\Delta$ isc<br>CFTRinh172 | -8.0          | 2.8 | -1.7        | 0.5 | -10.7    | 2.9 |
